# Supplementary material for: Reelin induces EphB activation
Source: PubMed Central journal article supplement — Cell Res. 2013 Jan 15;23(4):473–90. doi: 10.1038/cr.2013.7 (PMC3616423; doi:10.1038/cr.2013.7), 2013-01-15
Supplement: cr20137x1.pdf [file cr20137x1.pdf]

## Supplementary information, Figure S1

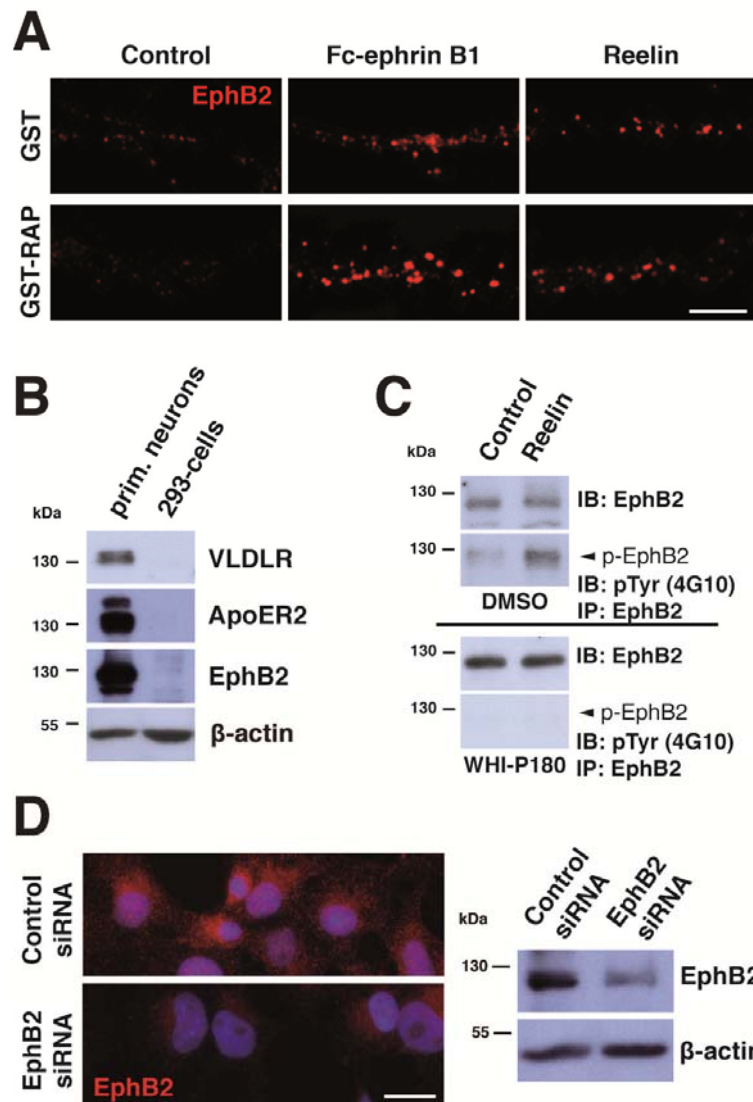

**Figure S1 (A)** Clustering of endogenous EphB2 (red) in primary cortical wild-type neurons after stimulation with preclustered ephrin B1 or Reelin. Pretreatment with the ApoE receptor antagonist GST-RAP does not prevent clustering. Scale bar, 5  $\mu$ m. **(B)** Expression of different Reelin receptors in primary neurons and HEK-293 cells. The cells were lysed, proteins (40  $\mu$ g/lane) were separated by SDS-PAGE and immunoblotted with the respective receptor antibodies. Neither ApoER2 or VLDLR nor EphB2 are detected in 293 cells. **(C)** Primary neurons were preincubated with

WHI-P180 (10  $\mu$ mol/l) or vehicle (DMSO) before stimulation with Reelin. Pretreatment with the kinase inhibitor prevented the induction of EphB2 tyrosine phosphorylation (bottom), as determined by immunoblotting with anti-phosphotyrosine antibody of the immunoprecipitated EphB2. **(D)** Cos-1 cells were treated with control siRNA or siRNA directed against human EphB2. 2 days later, the cells were fixed in 4% PFA and immunostained with an antibody against EphB2 (red, counterstain with DAPI, blue). For immunoblotting, Cos-1 cells were harvested and protein extracts separated by SDS-PAGE to show siRNA-mediated knockdown of EphB2. Actin served as a loading control.
