# Supplementary material for: Reelin induces EphB activation
Source: PubMed Central journal article supplement — Cell Res. 2013 Jan 15;23(4):473–90. doi: 10.1038/cr.2013.7 (PMC3616423; doi:10.1038/cr.2013.7), 2013-01-15
Supplement: cr20137x5.pdf [file cr20137x5.pdf]

## Supplementary information, Figure S5

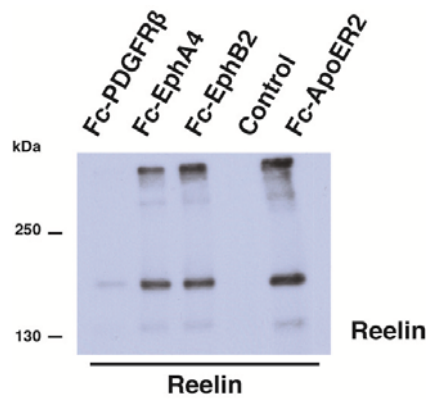

**Figure S5** Reelin binds to the extracellular domain of EphA subclass receptors. Recombinant Reelin was incubated with the Fc-tagged ectodomains of EphA4 and EphB2. After precipitation with protein A/G-beads, bound Reelin was detected by immunoblotting. Fc-ApoER2 served as a positive and Fc-PDGFR $\beta$  as negative control. Reelin was bound by the ectodomains of EphB2 and EphA4.
